# Supplementary material for: How Many Hours of Device Wear Time Are Required to Accurately Measure Physical Activity Post Stroke?
Source: MDPI journal article supplement (doi:10.3390/ijerph19031191), 2022-01-21
Supplement: s1 [file s1]

## SUPPLEMENTARY MATERIALS

Supplemental Table S1: Daily physical activity estimates for 10 - 14 h datasets, transformed data

| TRANSFORMED DATA | Sedentary awake time      | Time in LIPA              | Time in MVPA              |
|------------------|---------------------------|---------------------------|---------------------------|
| $\Delta 13$      | -1.129 (-1.412 to -0.846) | -0.474 (-0.747 to -0.200) | -0.321 (-0.705 to -0.062) |
| $\Delta 12$      | -2.112 (-2.392 to -1.832) | -0.942 (-1.213 to -0.672) | -0.664 (-1.044 to -0.285) |
| $\Delta 11$      | -3.131 (-3.407 to -2.854) | -1.425 (-1.692 to -1.158) | -0.917 (-1.292 to -0.542) |
| $\Delta 10$      | -4.063 (-4.340 to -3.786) | -1.892 (-2.160 to -1.625) | -1.217 (-1.592 to -0.842) |

Results are MD (95%CI)

Data are transformed: square root transformation (time in LIPA, time in MVPA) and inverse square root transformation (sedentary awake time); units not applicable
